# Supplementary material for: Sperm Competition and Paternity in the Endangered Firefly Pyrocoelia pectoralis (Coleoptera: Lampyridae: Lampyrinae)
Source: MDPI journal article supplement (doi:10.3390/insects15010066), 2024-01-17
Supplement: s1 [file s1]

## Supplementary Material

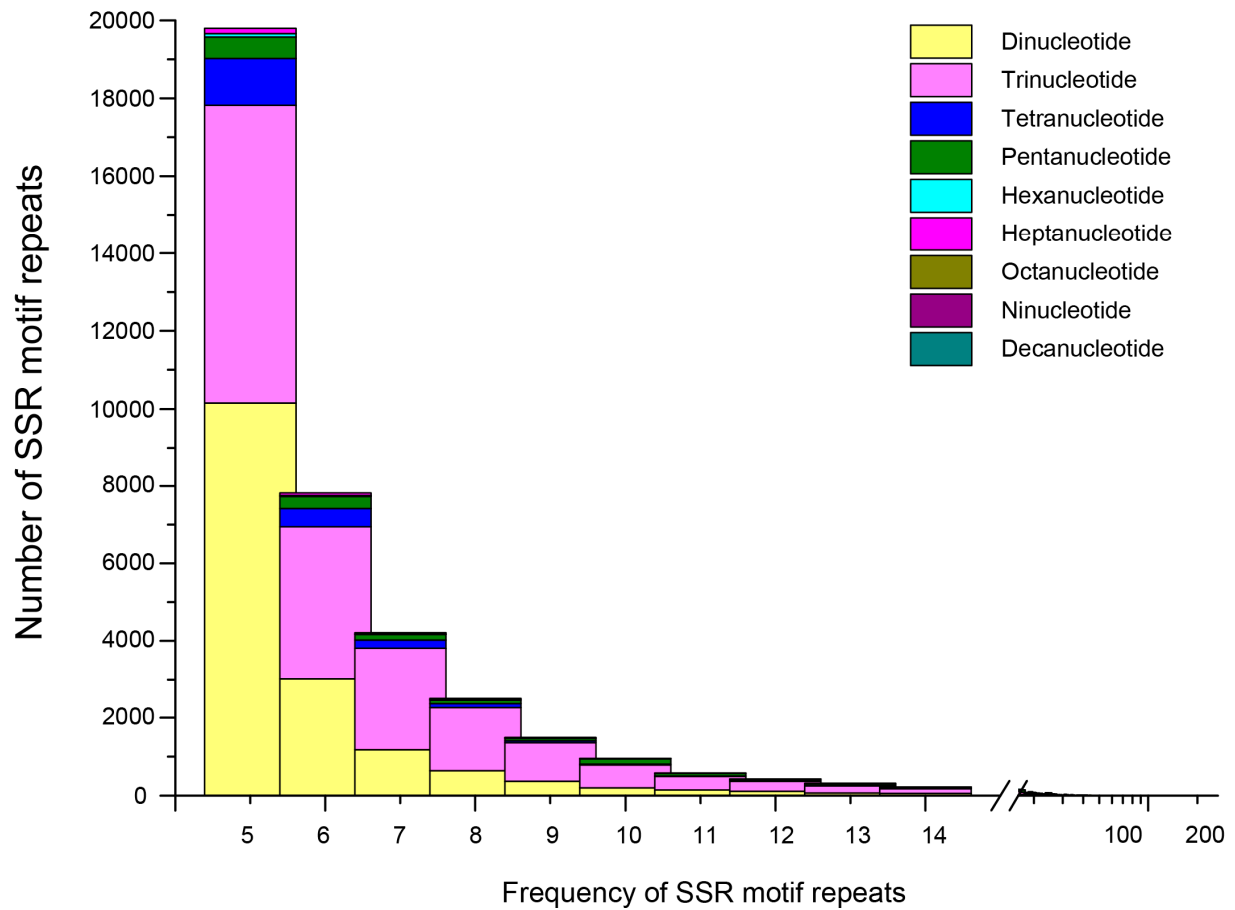

**Figure S1 Distribution and frequency of SSR motif repeat numbers.** The X-axis shows the frequencies of SSR types, while the Y-axis shows SSR repeat numbers.

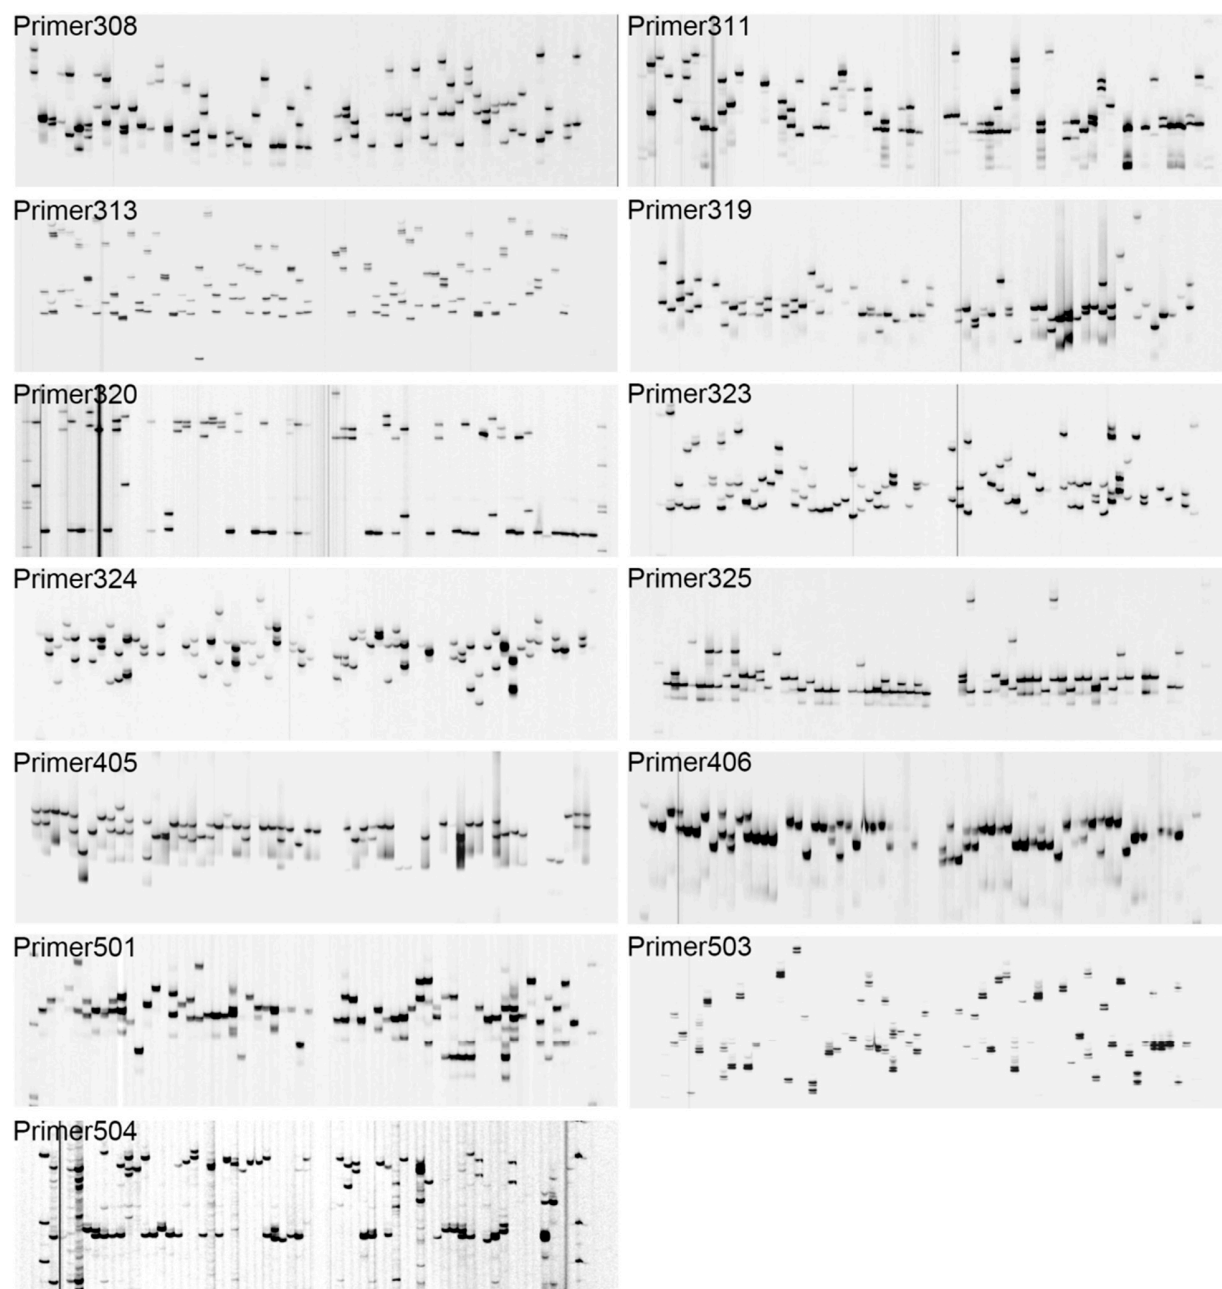

**Figure S2** PCR amplification result of 13 SSR loci. 13 pairs of primers showed clear and numerous polymorphism fragments in 6.5 % polyacrylamide gel.

**Table S1. SSR markers and characteristics of primers used in genetic analysis of *P. pectoralis***

| No | SSR name | Chr      | Start    | End      | Forward primer (5'-3')*  | Reverse primer (5'-3')   | motif   | Res ult |
|----|----------|----------|----------|----------|--------------------------|--------------------------|---------|---------|
| 1  | SSR301   | LG1<br>0 | 29525644 | 29524978 | TCGGTGTTCAGTGT<br>TGT    | AACCAGGAGCCAAA<br>GTGT   | (gat)6  |         |
| 2  | SSR302   | LG0<br>7 | 8220518  | 8221252  | AAAGCAGAAGCCCTA<br>CTAAA | AAACGGCCAATACC<br>AGAA   | (aat)6  |         |
| 3  | SSR303   | LG0<br>7 | 12624283 | 12624781 | CCCTTGGAAGATTTA<br>CAC   | AAGACTTGAAGAAA<br>GCTGC  | (aat)8  |         |
| 4  | SSR304   | LG0<br>3 | 38954751 | 38955635 | AAAAGCTGTGCCTTCT<br>TG   | TATTGCTGCTGTTTGG<br>GT   | (tta)8  |         |
| 5  | SSR305   | LG0<br>2 | 81923098 | 81922806 | ATACATCCATCGCAG<br>AGG   | GTGAAGCATTCCCAA<br>CAT   | (aga)9  |         |
| 6  | SSR306   | LG0<br>9 | 13832527 | 13832008 | GCGTGTAAGCATTGTC<br>TC   | GCCAAGAATCGGAT<br>ACATAA | (tac)21 |         |
| 7  | SSR307   | LG0<br>7 | 41331038 | 41330555 | CCGCTTACCTCGCTTA<br>TT   | AAAACATTAGGCGA<br>GGCT   | (tat)9  |         |
| 8  | SSR308   | LG0<br>7 | 39678327 | 39677588 | CAAAGCGGAACCTCA<br>AAC   | AACCAGGTAAAGGT<br>AGCG   | (aat)8  | OK      |
| 9  | SSR309   | LG0<br>6 | 21371206 | 21370365 | CCGCGCCACTGCTTTA<br>ATTT | GAGACGGTCTGTGCT<br>CGATT | (tat)21 |         |
| 10 | SSR310   | LG0<br>9 | 27597563 | 27596993 | ATCGTGTTTGTGCCTTT<br>C   | GTTTTACCGCTCGTT<br>CC    | (att)13 |         |
| 11 | SSR311   | LG0<br>4 | 30577309 | 30578070 | GAACAAATGGTTGAA<br>AGGAA | GCCGTTGCTATGAG<br>AAT    | (taa)12 | OK      |
| 12 | SSR312   | LG0<br>3 | 51062472 | 51062109 | GTGAGCGAGTCTCCA<br>GTG   | TGTATTCGGTTTGTGC<br>TA   | (taa)12 |         |

|    |        |          |          |          |                             |                          |          |    |
|----|--------|----------|----------|----------|-----------------------------|--------------------------|----------|----|
| 13 | SSR313 | LG0<br>7 | 40348582 | 40349582 | ACAAGGCAAACAGAG<br>CAT      | CTTCGATCATCTCCGT<br>CA   | (gaa)16  | OK |
| 14 | SSR314 | LG0<br>6 | 4767339  | 4766948  | ATTACTTACTCCCGTG<br>TAGAGT  | ATGCGGCGTGAAACA<br>ACT   | (tat)11  |    |
| 15 | SSR315 | LG0<br>5 | 47310835 | 47311093 | AGCAATTTCTTGGTGT<br>GGA     | ACGACTGACTCGGTC<br>TTAG  | (att)16  |    |
| 16 | SSR316 | LG0<br>7 | 30337313 | 30336867 | TCACTTTGCTAAGCTG<br>ATAAC   | TGTGCTAATGCGGAC<br>CTA   | (aat)13  |    |
| 17 | SSR317 | LG0<br>2 | 70162475 | 70162966 | GGAGCAAAACTGGTT<br>CGG      | TTATTGCACGACACG<br>GAG   | (ttgaa)7 |    |
| 18 | SSR318 | LG0<br>1 | 44698570 | 44697852 | TGCCCATTTCTTTTGTG<br>AATGCT | CGCGAGATGTTGAAC<br>ATGGG | (ata)17  |    |
| 19 | SSR319 | LG0<br>6 | 19495493 | 19494463 | ATTTGGGTTAGTTTAG<br>GC      | CACGCAAGAAGTGG<br>AGATA  | (tat)13  | OK |
| 20 | SSR320 | LG0<br>3 | 48825694 | 48825192 | TAATCCGCGACTGTTT<br>TG      | TTGACTCTACCGCAC<br>CTC   | (ata)12  | OK |
| 21 | SSR321 | LG0<br>6 | 40535170 | 40536088 | TTGACTCTACCGCACC<br>TC      | TGGGCGAAAGATGG<br>ATGT   | (aac)16  |    |
| 22 | SSR322 | LG0<br>1 | 63400534 | 63400170 | CAAAGCTGCGTTCATA<br>AT      | TTGCCACCATCACAA<br>TCT   | (tta)14  |    |
| 23 | SSR323 | LG0<br>8 | 19419411 | 19418388 | AGGACAGGGCACTCA<br>CAT      | TGGACATCGCAATCA<br>CTA   | (ata)15  | OK |
| 24 | SSR324 | LG0<br>3 | 41425698 | 41426739 | TATGTGCTTTGGCTTGT<br>G      | AAGTTCGGATGCTAA<br>TGC   | (tat)12  | OK |
| 25 | SSR325 | LG0<br>5 | 8988867  | 8989383  | CGCTTTTtagCACCTT<br>CA      | ACATACTTCGCCCAC<br>TCT   | (aat)15  | OK |
| 26 | SSR401 | LG0      | 24945156 | 24944269 | CTGAGAAACCAGCAT             | CGAATCGCATTAAAC          | (ttta)8  |    |

|    |        |     |          |          |                  |                  |           |    |
|----|--------|-----|----------|----------|------------------|------------------|-----------|----|
|    |        | 7   |          |          | CCG              | ACATA            |           |    |
| 27 | SSR402 | LG0 | 21650906 | 21651620 | TGAACCTATGACCCTT | TTCGTAATCTTTCACC | (tgtc)8   |    |
|    |        | 4   |          |          | GC               | GC               |           |    |
| 28 | SSR403 | LG0 | 42181662 | 42181439 | TGATTACTTCAATACC | TCCAGATTACATCGC  | (aatc)6   |    |
|    |        | 6   |          |          | CACC             | ACC              |           |    |
| 29 | SSR404 | LG0 | 40217516 | 40217970 | CAGGGATTCTTGAGAC | GCTAACTTGACGTAA  | (attg)7   |    |
|    |        | 3   |          |          | ACTT             | CCCTAAC          |           |    |
| 30 | SSR405 | LG1 | 10750335 | 10749891 | TTATTTACTGCAAACG | GCGAAAGACAGAAA   | (tatt)6   | OK |
|    |        | 0   |          |          | GTGAG            | GGGAC            |           |    |
| 31 | SSR406 | LG0 | 21272843 | 21273264 | TCTTGAATGGACGGAC | TTTCTATCCTTGAACG | (aaat)6   | OK |
|    |        | 7   |          |          | CTA              | CTGT             |           |    |
| 32 | SSR501 | LG0 | 43934651 | 43935197 | GCGTGGGCTGAAGAG  | TTGTGGAGGTGGCGA  | (ttgaa)7  | OK |
|    |        | 6   |          |          | GAT              | AGG              |           |    |
| 33 | SSR502 | LG0 | 40887538 | 40887995 | ACGCACGGGCATTGTC | AACCACCCTGGATCA  | (ttgta)7  |    |
|    |        | 4   |          |          | TT               | CCT              |           |    |
| 34 | SSR503 | LG0 | 7096085  | 7095375  | TGAGCATATATCGAAC | AACAAAGGTGGTTGG  | (tacaa)1  |    |
|    |        | 6   |          |          | GTAA             | TGA              | 9         | OK |
|    |        |     |          |          |                  |                  | (tacag)7  |    |
| 35 | SSR504 | LG0 | 12384299 | 12383838 | CTAAAAGTGCTGCTGG | TGTTTCAAATACAAT  | (atatt)5( | OK |
|    |        | 6   |          |          | CG               | GGTCTAA          | att)7     |    |
| 36 | SSR505 | LG0 | 11190281 | 11189675 | ATTCCTCGCACCCCTG | CCAAAAGGGATGTA   | (tattg)16 |    |
|    |        | 6   |          |          | TA               | AATGAT           |           |    |
| 37 | SSR506 | LG0 | 29254037 | 29255032 | CTGACTTATGGCGGCG | TGACACCCCAAAAAT  | (attac)7  |    |
|    |        | 7   |          |          | AA               | ACTGA            |           |    |
| 38 | SSR507 | LG0 | 28880322 | 28880503 | AGGCGTGTTACCTTTT | GCTTCCCATGCAAAC  | (taata)6  |    |
|    |        | 3   |          |          | CA               | CTT              |           |    |
| 39 | SSR508 | LG0 | 11190281 | 11189675 | ATTCCTCGCACCCCTG | TCCAAAAGGGATGTA  | (tattg)16 |    |

|    |                                  |     |          |          |                  |                 |          |
|----|----------------------------------|-----|----------|----------|------------------|-----------------|----------|
|    |                                  | 6   |          |          | TA               | AATGA           |          |
| 40 | SSR509                           | LG0 | 9202972  | 9203267  | GTCGCCTGAACAAAC  | TCACATTGGCAAATG | (ataac)8 |
|    |                                  | 9   |          |          | ACC              | ACG             |          |
| 41 | SSR510                           | LG0 | 29254037 | 29255032 | GACTTATGGCGGCGA  | ACATAGATCGTAACA | (attac)7 |
|    |                                  | 7   |          |          | ACC              | AGGCG           |          |
| 42 | SSR511                           | LG0 | 8254712  | 8253654  | TTCCTCAGGTAAGTCC | GCCCTATCCACCATT | (tatgg)6 |
|    |                                  | 7   |          |          | ACCAC            | TCG             |          |
| 43 | SSR512                           | LG0 | 2591547  | 2591933  | CGCAAGGGCATTACA  | TCAGGCGAAAATCA  | (taatt)7 |
|    |                                  | 1   |          |          | CGA              | GAAA            |          |
| 44 | SSR513                           | LG0 | 19116736 | 19117247 | GCGTCACAATCAACA  | GGCTTTTACAGAATC | (tttg)7  |
|    |                                  | 2   |          |          | CCT              | TACCG           |          |
| 45 | IRDye 800-labeled M13f-29 primer |     |          |          | CACGACGTTGTAAAA  |                 |          |
|    |                                  |     |          |          | CGAC             |                 |          |

---

\*Each forward SSR primer has a universal M13 19 bp tail sequence added at the 5' end (5'- CAC GAC GTT GTA AAA CGA C-3')

**Table S2 The body length, width, and weight of mating fireflies (25 female and 59 male).**

| Firefly       | body<br>lengt<br>h<br>(mm) | body<br>widt<br>h<br>(mm) | weigh<br>t (g) | Firefly     | body<br>lengt<br>h<br>(mm) | body<br>widt<br>h<br>(mm) | weigh<br>t (g) | Firefly | body<br>length<br>(mm) | body<br>width<br>(mm) | weight<br>(g) |
|---------------|----------------------------|---------------------------|----------------|-------------|----------------------------|---------------------------|----------------|---------|------------------------|-----------------------|---------------|
| Female-1      | 21.23                      | 7.53                      | 0.2740         | Male-4      | 17.10                      | 6.33                      | 0.0822         | Male-32 | 15.33                  | 6.14                  | 0.0631        |
| Female-2      | 22.11                      | 7.26                      | 0.3132         | Male-5      | 15.74                      | 5.68                      | 0.0711         | Male-33 | 15.26                  | 6.40                  | 0.0622        |
| Female-3      | 27.08                      | 8.59                      | 0.5890         | Male-6      | 16.68                      | 6.45                      | 0.0663         | Male-34 | 16.88                  | 6.35                  | 0.0678        |
| Female-4      | 26.49                      | 6.95                      | 0.3303         | Male-7      | 16.32                      | 6.22                      | 0.0698         | Male-35 | 17.27                  | 6.56                  | 0.0631        |
| Female-5      | 29.21                      | 8.05                      | 0.4718         | Male-8      | 16.41                      | 6.70                      | 0.0611         | Male-36 | 15.76                  | 5.88                  | 0.0468        |
| Female-6      | 27.76                      | 7.64                      | 0.3482         | Male-9      | 16.59                      | 6.33                      | 0.0647         | Male-37 | 15.67                  | 5.95                  | 0.0450        |
| Female-7      | 23.45                      | 6.30                      | 0.2992         | Male-1<br>0 | 16.44                      | 6.28                      | 0.0764         | Male-38 | 19.23                  | 7.17                  | 0.0946        |
| Female-8      | 21.37                      | 7.43                      | 0.2780         | Male-1<br>1 | 16.94                      | 6.73                      | 0.0829         | Male-39 | 18.67                  | 6.58                  | 0.0679        |
| Female-9      | 21.51                      | 7.49                      | 0.2785         | Male-1<br>2 | 16.69                      | 6.55                      | 0.0964         | Male-40 | 18.86                  | 7.35                  | 0.0832        |
| Female-1<br>0 | 24.03                      | 6.70                      | 0.2884         | Male-1<br>3 | 15.10                      | 5.74                      | 0.0699         | Male-41 | 17.96                  | 7.33                  | 0.0836        |
| Female-1<br>1 | 22.00                      | 7.22                      | 0.3032         | Male-1<br>4 | 16.86                      | 6.74                      | 0.0739         | Male-42 | 18.38                  | 7.37                  | 0.0793        |
| Female-1<br>2 | 21.44                      | 7.46                      | 0.2782         | Male-1<br>5 | 15.34                      | 6.41                      | 0.0532         | Male-43 | 17.66                  | 6.45                  | 0.0833        |
| Female-1<br>3 | 22.00                      | 7.25                      | 0.3092         | Male-1<br>6 | 15.35                      | 5.87                      | 0.1121         | Male-44 | 18.70                  | 6.70                  | 0.0685        |
| Female-1<br>4 | 29.10                      | 8.22                      | 0.4705         | Male-1<br>7 | 16.88                      | 6.82                      | 0.1028         | Male-45 | 17.54                  | 6.55                  | 0.0617        |
| Female-1<br>5 | 22.83                      | 6.01                      | 0.2693         | Male-1<br>8 | 15.93                      | 6.68                      | 0.1112         | Male-46 | 15.05                  | 5.70                  | 0.0444        |
| Female-1<br>6 | 23.03                      | 6.11                      | 0.2993         | Male-1<br>9 | 16.69                      | 5.89                      | 0.1231         | Male-47 | 15.88                  | 6.54                  | 0.0575        |
| Female-1<br>7 | 24.04                      | 6.69                      | 0.2783         | Male-2<br>0 | 17.04                      | 6.90                      | 0.1013         | Male-48 | 19.39                  | 7.21                  | 0.0944        |
| Female-1<br>8 | 22.00                      | 7.03                      | 0.2650         | Male-2<br>1 | 16.81                      | 6.31                      | 0.0919         | Male-49 | 19.03                  | 7.09                  | 0.0744        |
| Female-1<br>9 | 26.42                      | 7.91                      | 0.4464         | Male-2<br>2 | 17.54                      | 7.34                      | 0.1022         | Male-50 | 19.49                  | 7.86                  | 0.0977        |
| Female-2<br>0 | 27.00                      | 8.03                      | 0.4760         | Male-2<br>3 | 16.77                      | 6.87                      | 0.0978         | Male-51 | 19.27                  | 7.67                  | 0.0968        |

|               |       |      |        |             |       |      |        |         |                |        |        |       |
|---------------|-------|------|--------|-------------|-------|------|--------|---------|----------------|--------|--------|-------|
| Female-2<br>1 | 21.59 | 6.75 | 0.2633 | Male-2<br>4 | 15.95 | 6.36 | 0.1003 | Male-52 | 18.66          | 7.18   | 0.0833 |       |
| Female-2<br>2 | 27.00 | 8.33 | 0.5877 | Male-2<br>5 | 15.80 | 6.30 | 0.0643 | Male-53 | 17.93          | 7.31   | 0.0841 |       |
| Female-2<br>3 | 27.03 | 8.51 | 0.5891 | Male-2<br>6 | 14.32 | 5.70 | 0.0635 | Male-54 | 16.34          | 6.14   | 0.0623 |       |
| Female-2<br>4 | 24.04 | 6.70 | 0.2777 | Male-2<br>7 | 15.45 | 5.80 | 0.0667 | Male-55 | 16.48          | 6.32   | 0.0654 |       |
| Female-2<br>5 | 22.00 | 7.25 | 0.3092 | Male-2<br>8 | 15.74 | 5.77 | 0.0622 | Male-56 | 17.89          | 7.17   | 0.0610 |       |
| Male-1        | 16.24 | 5.96 | 0.1524 | Male-2<br>9 | 15.42 | 5.91 | 0.0656 | Male-57 | 17.70          | 7.17   | 0.0767 |       |
| Male-2        | 16.38 | 6.26 | 0.1400 | Male-3<br>0 | 14.68 | 5.79 | 0.0637 | Male-58 | 15.92          | 6.13   | 0.1121 |       |
| Male-3        | 16.13 | 5.84 | 0.1424 | Male-3<br>1 | 16.28 | 5.87 | 0.0666 | Male-59 | 17.14          | 6.57   | 0.0690 |       |
|               |       |      |        |             |       |      |        |         | Female average | 24.23± | 7.34±  | 0.36± |
|               |       |      |        |             |       |      |        |         |                | 2.61   | 0.70   | 0.11  |
|               |       |      |        |             |       |      |        |         | male average   | 16.80± | 6.50±  | 0.08± |
|               |       |      |        |             |       |      |        |         |                | 1.27   | 0.55   | 0.02  |

**Table S3 Identification and characteristics of SSR motifs in the *P. pectoralis* genome**

| Motif           | Repeats | Length | Percentage of repeats | Max motif length | Min motif length | Average motif length |
|-----------------|---------|--------|-----------------------|------------------|------------------|----------------------|
| Dinucleotide    | 16370   | 209166 | 41.04                 | 538              | 10               | 12.76                |
| Trinucleotide   | 18725   | 379920 | 46.94                 | 153              | 15               | 20.28                |
| Tetranucleotide | 2131    | 53100  | 5.34                  | 312              | 20               | 24.88                |
| Pentanucleotide | 1956    | 109200 | 4.9                   | 600              | 25               | 55.8                 |
| Hexanucleotide  | 228     | 12972  | 0.57                  | 330              | 30               | 56.88                |
| Heptanucleotide | 297     | 14091  | 0.74                  | 294              | 35               | 47.39                |
| Octanucleotide  | 125     | 6424   | 0.31                  | 144              | 40               | 51.36                |
| Ninucleotide    | 51      | 3006   | 0.13                  | 261              | 45               | 58.86                |
| Decanucleotide  | 7       | 430    | 0.02                  | 80               | 50               | 61.4                 |
| Total           | 39890   | 788309 | 100                   | 600              | 10               | 40.8                 |

**Table S4 Top15 repeat of different types of SSR motif.**

| name                         | Repeats      | length        | Percentage of repeats |
|------------------------------|--------------|---------------|-----------------------|
| <b>Total dinucleotide</b>    | <b>16370</b> | <b>209166</b> | <b>100%</b>           |
| TA/AT                        | 6290         | 80020         | 38.42%                |
| TG/CA                        | 4977         | 60186         | 30.40%                |
| TC/GA                        | 4215         | 58936         | 25.75%                |
| GC/CG                        | 888          | 10024         | 5.42%                 |
| <b>Total trinucleotide</b>   | <b>18725</b> | <b>379920</b> | <b>100%</b>           |
| ATT/AAT                      | 15578        | 319896        | 83.19%                |
| AGA/TCT                      | 1183         | 24123         | 6.32%                 |
| ACT/AGT                      | 466          | 9441          | 2.49%                 |
| ATG/CAT                      | 433          | 7659          | 2.31%                 |
| AGG/CCT                      | 316          | 6243          | 1.69%                 |
| AAC/GTT                      | 301          | 5115          | 1.61%                 |
| ACG/CGT                      | 162          | 2649          | 0.87%                 |
| ACC/GGT                      | 126          | 2052          | 0.67%                 |
| AGC/GCT                      | 108          | 1890          | 0.58%                 |
| CCG/CGG                      | 52           | 852           | 0.28%                 |
| <b>Total tetranucleotide</b> | <b>2131</b>  | <b>53100</b>  | <b>100%</b>           |
| TTTA/TAAA                    | 1190         | 28912         | 55.84%                |

**Table S5** Genetic characterization of 13 polymorphic SSR loci of 60 males.

| Locus  | N  | Na     | Ne     | I     | Ho    | He    | uHe   | PIC   | HWE |
|--------|----|--------|--------|-------|-------|-------|-------|-------|-----|
| SSR308 | 60 | 10     | 8.706  | 2.215 | 0.767 | 0.885 | 0.893 | 0.874 | ns  |
| SSR311 | 60 | 13     | 10.811 | 2.429 | 0.75  | 0.908 | 0.915 | 0.9   | ns  |
| SSR313 | 60 | 22     | 13.74  | 2.829 | 0.867 | 0.927 | 0.935 | 0.923 | ns  |
| SSR319 | 60 | 10     | 8.582  | 2.193 | 0.75  | 0.883 | 0.891 | 0.872 | ns  |
| SSR320 | 60 | 13     | 10.169 | 2.408 | 0.883 | 0.902 | 0.909 | 0.893 | ns  |
| SSR323 | 60 | 15     | 11.392 | 2.561 | 0.833 | 0.912 | 0.92  | 0.906 | ns  |
| SSR324 | 60 | 15     | 10.762 | 2.521 | 0.9   | 0.907 | 0.915 | 0.9   | ns  |
| SSR325 | 60 | 12     | 3.169  | 1.532 | 0.433 | 0.684 | 0.69  | 0.637 | *** |
| SSR405 | 60 | 9      | 7.725  | 2.111 | 0.767 | 0.871 | 0.878 | 0.857 | ns  |
| SSR406 | 60 | 4      | 2.463  | 1.042 | 0.4   | 0.594 | 0.599 | 0.516 | *** |
| SSR501 | 60 | 9      | 8.295  | 2.156 | 0.733 | 0.879 | 0.887 | 0.867 | ns  |
| SSR503 | 60 | 34     | 16.552 | 3.169 | 0.483 | 0.94  | 0.947 | 0.937 | *** |
| SSR504 | 60 | 12     | 10.959 | 2.438 | 0.767 | 0.909 | 0.916 | 0.901 | ns  |
| Mean   | 60 | 13.692 | 9.487  | 2.277 | 0.718 | 0.862 | 0.869 | 0.845 |     |
| SE     | 0  | 2.052  | 1.053  | 0.148 | 0.047 | 0.028 | 0.029 | 0.119 |     |

\*\*\*Highly significant from HWE ( $P < 0.001$ ).

N = Number of examined individuals

Na = No. of different alleles.

Ne = No. of effective alleles =  $1/(\sum p_i^2)$ .

I = Shannon's Information Index =  $-1 * \sum (p_i * \ln(p_i))$ .

Ho = observed heterozygosity = no. of Hets/N.

He = expected heterozygosity =  $1 - \sum p_i^2$ .

uHe = unbiased expected heterozygosity =  $(2N/(2N - 1)) * He$ .

PIC = polymorphism information content.

HWE = Hardy–Weinberg equilibrium

ns = no significance

**Table S6 Summary of Chi-Square Tests for Hardy-Weinberg Equilibrium (HWE).**

| Locus  | Degrees of freedom | Chi-square value | P-value | Significance |
|--------|--------------------|------------------|---------|--------------|
| SSR308 | 45                 | 37.176           | 0.79    | ns           |
| SSR311 | 78                 | 85.672           | 0.258   | ns           |
| SSR313 | 231                | 244.279          | 0.262   | ns           |
| SSR319 | 45                 | 45.32            | 0.459   | ns           |
| SSR320 | 78                 | 71.676           | 0.68    | ns           |
| SSR323 | 105                | 126.831          | 0.072   | ns           |
| SSR324 | 105                | 81.5             | 0.957   | ns           |
| SSR325 | 66                 | 231.958          | 0       | ***          |
| SSR405 | 36                 | 42.219           | 0.22    | ns           |
| SSR406 | 6                  | 35.566           | 0       | ***          |
| SSR501 | 36                 | 44.995           | 0.145   | ns           |
| SSR503 | 561                | 1088.711         | 0       | ***          |
| SSR504 | 66                 | 82.82            | 0.079   | ns           |

\*\*\*Highly significant from Hardy–Weinberg equilibrium ( $P < 0.001$ )

Ns=no significance

|                                 | progeny number allocation |         |         | percentage |        |        |
|---------------------------------|---------------------------|---------|---------|------------|--------|--------|
| Replicates                      | P1                        | P2      | P3      | P1         | P2     | P3     |
| F1×M2-1                         | 36                        | 15      | —       | 0.7059     | 0.2941 | —      |
| F1×M2-2                         | 20                        | 33      | —       | 0.3774     | 0.6226 | —      |
| F1×M2-3                         | 68                        | 8       | —       | 0.8947     | 0.1053 | —      |
| F1×M2-4                         | 10                        | 40      | —       | 0.2000     | 0.8000 | —      |
| F1×M2-5                         | 2                         | 99      | —       | 0.0198     | 0.9802 | —      |
| F1×M2-6                         | 50                        | 38      | —       | 0.5682     | 0.4318 | —      |
| F1×M2-7                         | 83                        | 48      | —       | 0.6336     | 0.3664 | —      |
| F1×M2-8                         | 55                        | 10      | —       | 0.8462     | 0.1538 | —      |
| F1×M2-9                         | 70                        | 9       | —       | 0.8861     | 0.1139 | —      |
| F1×M2-10                        | 69                        | 6       | —       | 0.9200     | 0.0800 | —      |
| F1×M2-11                        | 21                        | 46      | —       | 0.3134     | 0.6866 | —      |
| F1×M2-12                        | 4                         | 78      | —       | 0.0488     | 0.9512 | —      |
| F1×M2-13                        | 77                        | 23      | —       | 0.7700     | 0.2300 | —      |
| F1×M2-14                        | 9                         | 129     | —       | 0.0652     | 0.9348 | —      |
| F1×M2-15                        | 43                        | 48      | —       | 0.4725     | 0.5275 | —      |
| F1×M2-16                        | 88                        | 11      | —       | 0.8889     | 0.1111 | —      |
| F1×M3-1                         | 19                        | 27      | 41      | 0.2184     | 0.3103 | 0.4713 |
| F1×M3-2                         | 6                         | 6       | 81      | 0.0645     | 0.0645 | 0.8710 |
| F1×M3-3                         | 18                        | 0       | 63      | 0.2222     | 0.0000 | 0.7778 |
| F1×M3-4                         | 0                         | 39      | 39      | 0.0000     | 0.5000 | 0.5000 |
| F1×M3-5                         | 37                        | 7       | 14      | 0.6379     | 0.1207 | 0.2414 |
| F1×M3-6                         | 7                         | 5       | 55      | 0.1045     | 0.0746 | 0.8209 |
| F1×M3-7                         | 4                         | 25      | 53      | 0.0488     | 0.3049 | 0.6463 |
| F1×M3-8                         | 1                         | 55      | 5       | 0.0164     | 0.9016 | 0.0820 |
| F1×M3-9                         | 0                         | 0       | 49      | 0.0000     | 0.0000 | 1.0000 |
| Descriptive Statistics of F1×M2 |                           |         |         |            |        |        |
|                                 | N                         | Mean    | SD      | SEM        |        |        |
| F1×M2-P1                        | 16                        | 0.53816 | 0.32971 | 0.08243    |        |        |
| F1×M2-P2                        | 16                        | 0.46184 | 0.32971 | 0.08243    |        |        |
| Difference                      |                           | 0.07633 |         |            |        |        |
| t-Test Statistics of F1×M2      |                           |         |         |            |        |        |
|                                 | t Statistic               | DF      | Prob> t |            |        |        |
| Equal Variance Assumed          | 0.65478                   | 30      | 0.5176  |            |        |        |
| Equal Variance NOT Assumed      | 0.65478                   | 30      | 0.5176  |            |        |        |
| Descriptive Statistics of F1×M3 |                           |         |         |            |        |        |

|          | Sample<br>Size | Mean    | Standard Deviation | SE of<br>Mean |
|----------|----------------|---------|--------------------|---------------|
| F1×M3-P1 | 9              | 0.14586 | 0.20319            | 0.06773       |
| F1×M3-P2 | 9              | 0.25297 | 0.29593            | 0.09864       |
| F1×M3-P3 | 9              | 0.60118 | 0.30403            | 0.10134       |

#### One Way ANOVA of F1×M3

|       | DF | Sum<br>Squares | of<br>Mean Square | F Value | Prob><br>F |
|-------|----|----------------|-------------------|---------|------------|
| Model | 2  | 1.02012        | 0.51006           | 6.91458 | 0.00425    |
| Error | 24 | 1.77038        | 0.07377           |         |            |
| Total | 26 | 2.7905         |                   |         |            |

#### Means Comparisons by Fisher Test of F1×M3

|                   | MeanDiff | SEM     | t Value | Prob    | Alpha | Sig |
|-------------------|----------|---------|---------|---------|-------|-----|
| F1×M3-P2 F1×M3-P1 | 0.10711  | 0.12803 | 0.83658 | 0.41108 | 0.05  | 0   |
| F1×M3-P3 F1×M3-P1 | 0.45532  | 0.12803 | 3.55628 | 0.0016  | 0.05  | 1   |
| F1×M3-P3 F1×M3-P2 | 0.34821  | 0.12803 | 2.7197  | 0.01195 | 0.05  | 1   |
